# Supplementary material
Source: HighWire-hosted journal article supplement (https://bjo.bmj.com/content/106/7/1012)

A

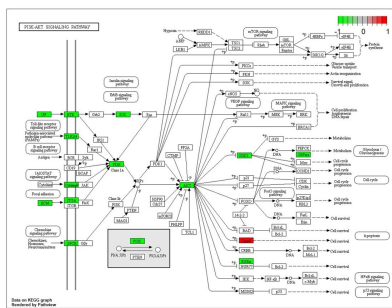

B

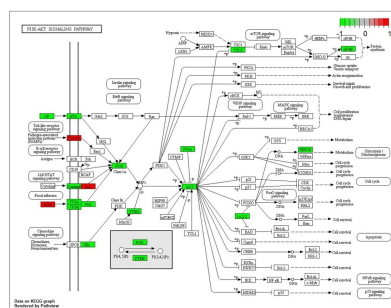

C

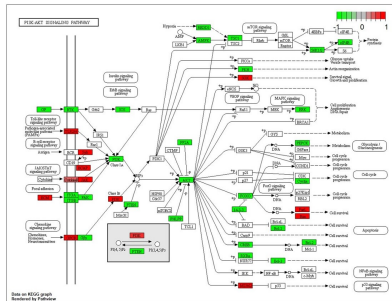

D

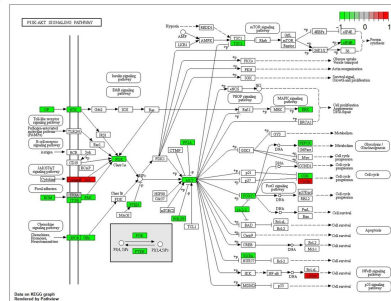

Supplement: inline-supplementary-material-2 [file inline-supplementary-material-2.pdf]

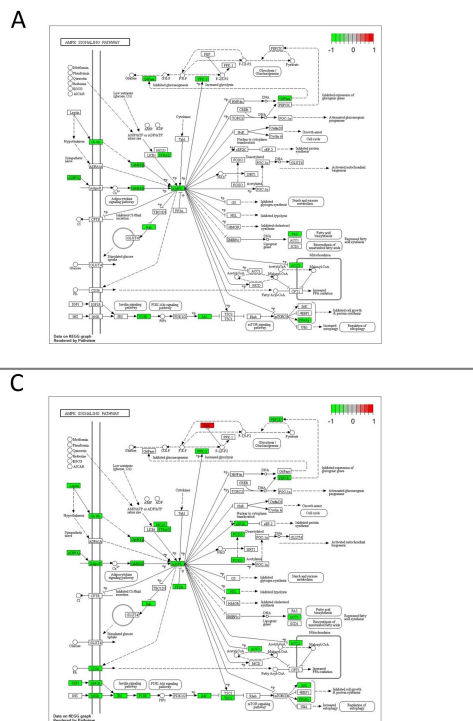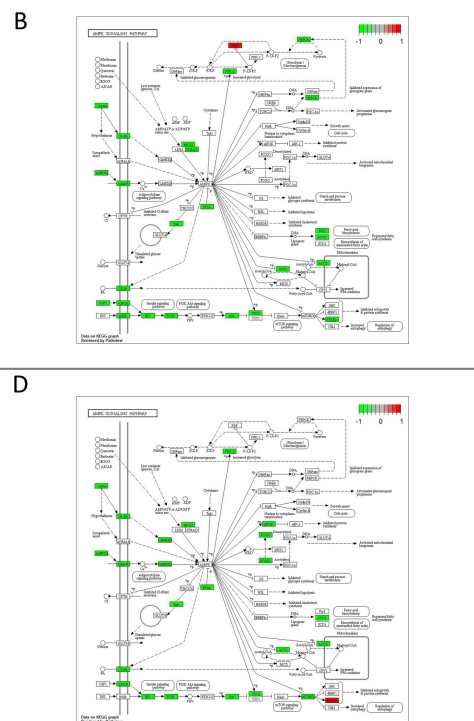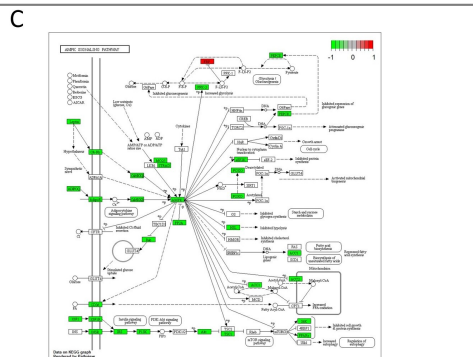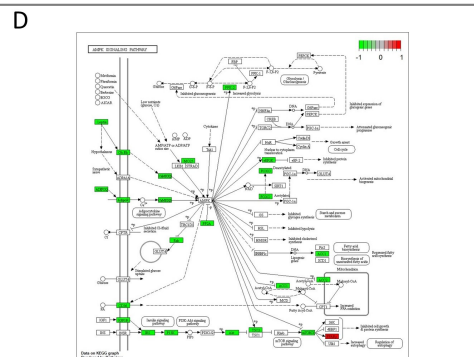

Supplement: inline-supplementary-material-4 [file inline-supplementary-material-4.pdf]
